# Supplementary material for: Metabolomics approach by 1H NMR spectroscopy of serum reveals progression axes for asymptomatic hyperuricemia and gout
Source: Springer Nature journal article supplement (doi:10.1186/s13075-018-1600-5), 2018-06-05
Supplement: MOESM2 [file 15821764]

A

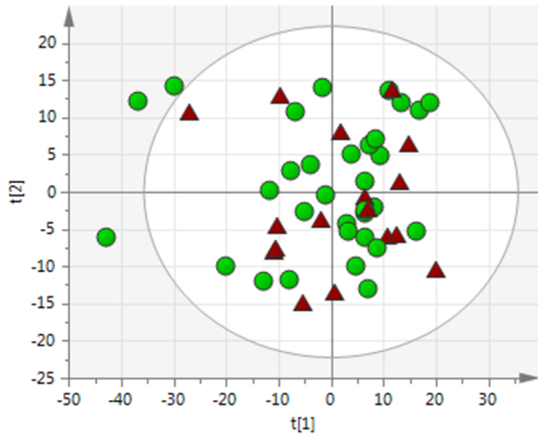

B

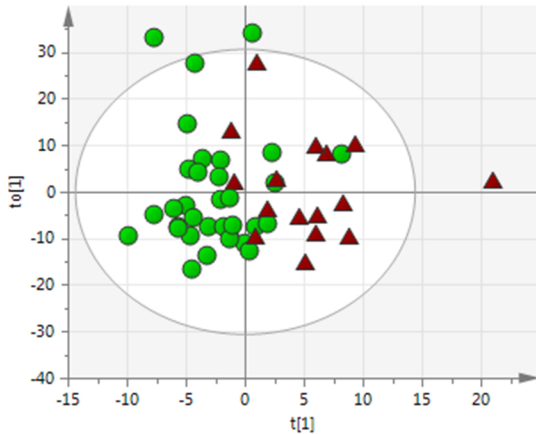

- Gout & HUA+
- ▲ Gout & HUA-
